# Supplementary material
Source: publisher figshare collection journal article supplement (https://tandf.figshare.com/ndownloader/files/15655658)

**Graphical abstract**


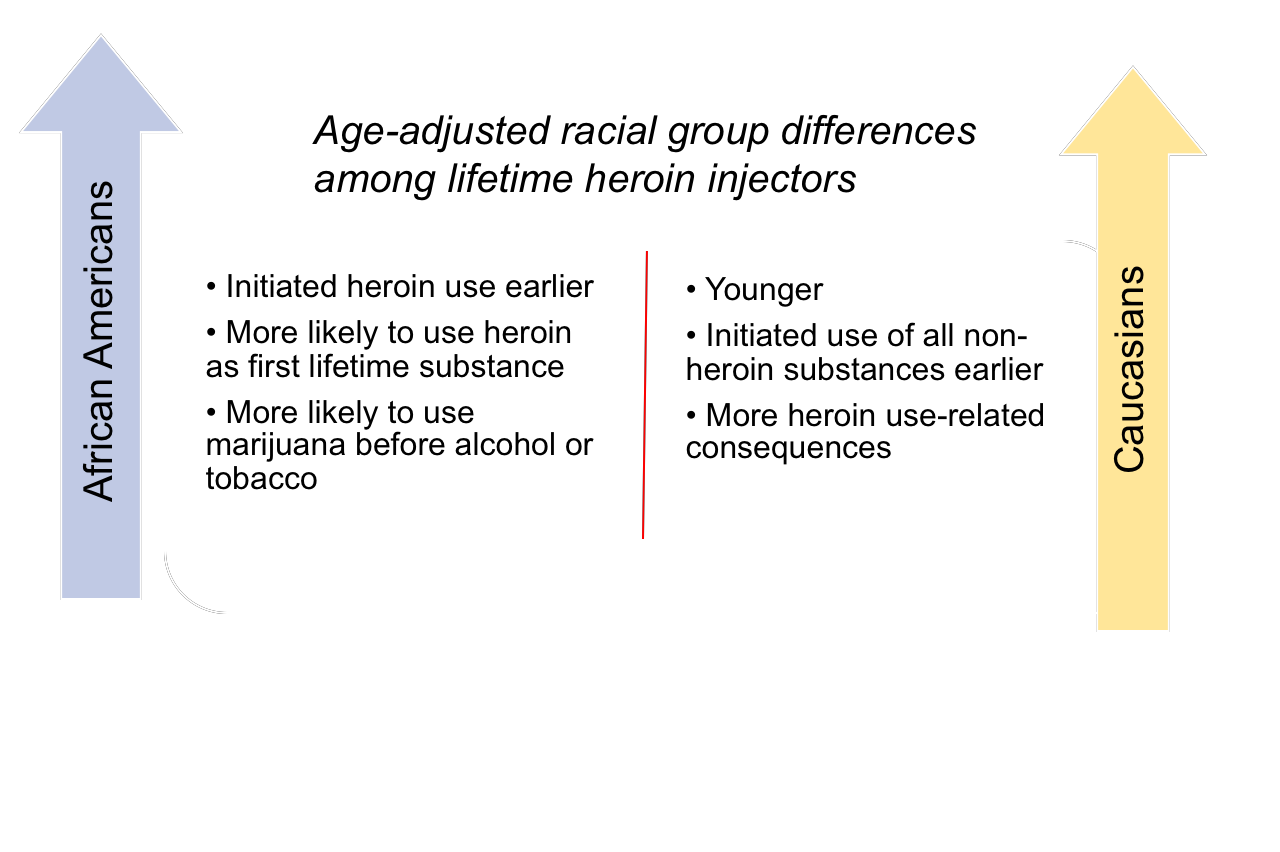

Supplement: Supplementary file 1 [file 15655658]
